# Supplementary material
Source: publisher site journal article supplement (https://www.dovepress.com/article/358761)
Supplement: Supplementary file 1 [file get_supplementary_file.php]

**Supplementary Information 1 Enrollment Criteria for Prediction score projects**

**Enrollment Inclusion Criteria**

Subject must have met at least one clinical criteria to be eligible for treatment in the study:

1. Adult patients ≥65 years of age (n=1350)
2. Female gender (n=881)
3. Documented PAD or CAD/PAD revascularization (n=654)
4. Diabetes mellitus (n=1347)
5. Chronic kidney disease (n=328)
6. Troponin positive (n=1860)
7. The subject (n=4130) had consented to participate and had authorized the collection and release of his medical information by signing the “Patient Informed Consent Form”.

Subject must have met at least one angiographic criteria to be eligible for treatment in the study:

1. Multi-vessel coronary artery disease (n=2976)
2. Target lesion requiring total stent length>30 mm (n=1085)
3. Thrombotic target lesion (n=1574)
4. Bifurcation lesions (n=1356)
5. Left main (≥50%) or proximal LAD (≥70%) lesion (n=1774)
6. Calcified target lesion (n=1369)

**Candidate Variables for Model Building**

Variables were considered for model building if they demonstrated a priori associations with major adverse cardiovascular and cerebrovascular events (MACCE) in previously published literature and were thought to have a clinically plausible relationship with both ischemia and bleeding outcomes.

**Endpoint Definitions**

All-cause death, re-myocardial infarction, revascularization, heart failure, ischemic stroke, hemorrhagic stroke

**Supplementary table 1: LASSO regression**

| Variables | Variables |
| --- | --- |
| Age≦40 | Risk factors |
| 40<Age≦50 | Hypertension |
| 50<Age≦60 | Diabetes |
| 60<Age≦70 | [Atrial fibrillation](http://www.baidu.com/link?url=mme3aA3sg8G0gGf26Lb5Gh3kriqhyTVcYFOh8BiFsvaO11zuD7IrtT8QZ0KufseQRj--2ZGStOFSTKRGHHXgij21GeOXq26qyiBliqxPs7tLCrUR9BXd5hkDAUovAoo3) |
| 70<Age≦80 | CKD |
| Age>80 | Previous CABG |
| Male | Previous PCI |
| Optimal BP | Inflammatory factors |
| Normal BP | D-dimer≧0.5 |
| Hi Normal BP | hs-CRP≦3.5 |
| hypertension | 3.5<hs-CRP≦10 |
| Killip I | hs-CRP>10 |
| Killip II | Renal function |
| Killip III | Crea<44 |
| Killip IV | 44≦Crea≦133 |
| IABP using | Crea>133 |
| EF at admission>55 | eGFR≧90 |
| 45<EF at admission≦55 | 60≦eGFR<90 |
| EF at admission≦45 | eGFR<60 |
| DTB time | lipid levels |
| Results of coronary angiography | LDL-C≧3.0mmol/L |
| LM lesion | HDL-C<1.0 mmol/L |
| No-reflow phenomenon | TG≧1.70 mmol/L |
| Triple-vessel lesions | Lpa>300 |
| Complete revascularization | The lesion type |
| Culprit vessel | Denove lesion |
| LCX | In-stent restenosis |
| RCA | Stent thrombosis |
| LAD | Ticagrelor[%(n)] |
| LM | P2Y12 inhibitors |
| SVG and others |  |
| Degree of vascular stenosis |  |
| coronary artery≦70%LM≦50% |  |
| 70%<coronary artery≦80%,  50%<LM≦50% |  |
| 80%<coronary artery≦90%,  60%<LM≦80% |  |
| 90%<coronary artery  80%<LM |  |

BP, blood pressure; IABP, Intra-aortic balloon pump; EF, ejection fraction; DTB time, door to balloon time; CKD, chronic kidney disease; Crea, creatinine; eGFR, estimated glomerular filtration rate; PCI, percutaneous coronary intervention; CABG, coronary artery bypass grafting; HDL-C, high-density lipoprotein cholesterol; LDL-C, low-density lipoprotein cholesterol; TG, triglyceride; LPA, lipse activator; hs-CRP, high sensitive C-reactive protein; LM, Left main lesion; LCX, left circumflex coronary artery; RCA, right coronary artery; LAD, left anterior descending branch; SVG, saphenous vein graft;

**Supplementary Model 1: Full model from observed data**
0.02308*(AGE.GROUP=2)-0.50803*(AGE.GROUP=3)-1.38581*(AGE.GROUP=4)-2.55753*(AGE.GROUP=5) -3.70453*(AGE.GROUP=6) +0.12930*(KILLIP=2) +0.54131*(KILLIP=3) +1.14814*(KILLIP=4) -0.18817*(EF=1)+0.75118*(HISTORY.OF.CAGB.1=1)+0.40747*(TYPES.OF.LESIONS=2)+0.34999*(TYPES.OF.LESIONS=3)-0.16277*(COMPLETE.REVASCULARIZATION=1)+0.67543*(MULTI.VESSEL.DISEASE=1); Log likelihood -3402.7877

**Supplementary table 2 multivariate cox regression by full model from observed data**

| Variables | Coefficiency | Wald | HR | Low 95%CI | High 95%CI | P value |
| --- | --- | --- | --- | --- | --- | --- |
| 40<Age≦50 | 0.0231 | 0.2963 | 1.0233 | 0.5726 | 1.8291 | 0.9379 |
| 50<Age≦60 | -0.5080 | 0.2990 | 0.6017 | 0.3348 | 1.0812 | 0.0893 |
| 60<Age≦70 | -1.3858 | 0.3057 | 0.2501 | 0.1374 | 0.4553 | <0.0001 |
| 70<Age≦80 | -2.5575 | 0.3237 | 0.0775 | 0.0411 | 0.1462 | <0.0001 |
| Age>80 | -3.7045 | 0.3964 | 0.0246 | 0.0113 | 0.0535 | <0.0001 |
| Killip II | 0.1293 | 0.1339 | 1.1380 | 0.8754 | 1.4794 | 0.3341 |
| Killip III | 0.5413 | 0.2957 | 1.7183 | 0.9625 | 3.0674 | 0.0671 |
| Killip IV | 1.1481 | 0.1954 | 3.1523 | 2.1493 | 4.6234 | <0.0001 |
| EF at admission>50% | -0.1882 | 0.0971 | 0.8285 | 0.6849 | 1.0022 | 0.0527 |
| Previous CABG | 0.7512 | 0.3082 | 2.1195 | 1.1585 | 3.8776 | 0.0148 |
| In-stent restenosis | 0.4075 | 0.2867 | 1.5030 | 0.8569 | 2.6363 | 0.1552 |
| Stent thrombosis | 0.3500 | 0.2029 | 1.4190 | 0.9535 | 2.1119 | 0.0845 |
| Complete revascularization | -0.1628 | 0.1093 | 0.8498 | 0.6860 | 1.0527 | 0.1363 |
| Muti-vessel lesions | 0.6754 | 0.1280 | 1.9649 | 1.5289 | 2.5252 | <0.0001 |

| concordant | discordant | tied.risk | tied.time | std(c-d) | C | se(C) |
| --- | --- | --- | --- | --- | --- | --- |
| 373297 | 157347 | 23282 | 10 | 16449.6674 | 0.6949 | 0.0148 |

**Supplementary Model 2:** Stepwise (stepAIC) selected model from observed data
0.02308*(AGE.GROUP=2) -0.50803*(AGE.GROUP=3) -1.38581*(AGE.GROUP=4) -2.55753*(AGE.GROUP=5) -3.70453*(AGE.GROUP=6) +0.12930*(KILLIP=2) +0.54131*(KILLIP=3) +1.14814*(KILLIP=4) -0.18817*(EF=1) +0.75118*(HISTORY.OF.CAGB.1=1) +0.40747*(TYPES.OF.LESIONS=2) +0.34999*(TYPES.OF.LESIONS=3) -0.16277*(COMPLETE.REVASCULARIZATION=1) +0.67543*(MULTI.VESSEL.DISEASE=1)

Log likelihood -3402.7877

**Supplementary table 3 multivariate cox regression by stepwise selected model from observed data**

| Variables | Coefficiency | Wald | HR | Low 95%CI | High 95%CI | P value |
| --- | --- | --- | --- | --- | --- | --- |
| 40<Age≦50 | 0.0231 | 0.2963 | 1.0233 | 0.5726 | 1.8291 | 0.9379 |
| 50<Age≦60 | -0.5080 | 0.2990 | 0.6017 | 0.3348 | 1.0812 | 0.0893 |
| 60<Age≦70 | -1.3858 | 0.3057 | 0.2501 | 0.1374 | 0.4553 | <0.0001 |
| 70<Age≦80 | -2.5575 | 0.3237 | 0.0775 | 0.0411 | 0.1462 | <0.0001 |
| Age>80 | -3.7045 | 0.3964 | 0.0246 | 0.0113 | 0.0535 | <0.0001 |
| Killip II | 0.1293 | 0.1339 | 1.1380 | 0.8754 | 1.4794 | 0.3341 |
| Killip III | 0.5413 | 0.2957 | 1.7183 | 0.9625 | 3.0674 | 0.0671 |
| Killip IV | 1.1481 | 0.1954 | 3.1523 | 2.1493 | 4.6234 | <0.0001 |
| EF at admission>50% | -0.1882 | 0.0971 | 0.8285 | 0.6849 | 1.0022 | 0.0527 |
| Previous CABG | 0.7512 | 0.3082 | 2.1195 | 1.1585 | 3.8776 | 0.0148 |
| In-stent restenosis | 0.4075 | 0.2867 | 1.5030 | 0.8569 | 2.6363 | 0.1552 |
| Stent thrombosis | 0.3500 | 0.2029 | 1.4190 | 0.9535 | 2.1119 | 0.0845 |
| Complete revascularization | -0.1628 | 0.1093 | 0.8498 | 0.6860 | 1.0527 | 0.1363 |
| Muti-vessel lesions | 0.6754 | 0.1280 | 1.9649 | 1.5289 | 2.5252 | <0.0001 |

**Supplementary table 4 ROC curve analysis and optimal threshold analysis of prediction model**

| Model | Time | Best.cut.X | Best.cut.sens | Best.cut.spec | Cases | N.survivor | N.censored | Cum.incidence | Surv.prob | AUC |
| --- | --- | --- | --- | --- | --- | --- | --- | --- | --- | --- |
| Full | 422.939027 | 0.995612 | 0.681 | 0.575 | 103 | 1757 | 431 | 0.048 | 0.9522 | 0.633 |
| Full | 577.121597 | 0.703542 | 0.697 | 0.776 | 159 | 1391 | 741 | 0.081 | 0.9187 | 0.771 |
| Full | 875.536805 | 0.851291 | 0.715 | 0.9 | 214 | 1039 | 1038 | 0.122 | 0.8781 | 0.845 |
| Full | 1410.673611 | 0.995612 | 0.618 | 0.949 | 265 | 884 | 1142 | 0.168 | 0.8317 | 0.81 |
| Full | 1824.966666 | 1.048901 | 0.567 | 0.917 | 319 | 749 | 1223 | 0.222 | 0.7784 | 0.806 |
| Full | 2100.564784 | 1.216299 | 0.75 | 0.783 | 373 | 594 | 1324 | 0.282 | 0.7183 | 0.823 |
| Full | 2332.835343 | 1.429327 | 0.795 | 0.918 | 427 | 438 | 1426 | 0.354 | 0.6461 | 0.886 |
| Stepwise | 422.939027 | 0.995612 | 0.681 | 0.575 | 103 | 1757 | 431 | 0.048 | 0.9522 | 0.633 |
| Stepwise | 577.121597 | 0.703542 | 0.697 | 0.776 | 159 | 1391 | 741 | 0.081 | 0.9187 | 0.771 |
| Stepwise | 875.536805 | 0.851291 | 0.715 | 0.9 | 214 | 1039 | 1038 | 0.122 | 0.8781 | 0.845 |
| Stepwise | 1410.673611 | 0.995612 | 0.618 | 0.949 | 265 | 884 | 1142 | 0.168 | 0.8317 | 0.81 |
| Stepwise | 1824.966666 | 1.048901 | 0.567 | 0.917 | 319 | 749 | 1223 | 0.222 | 0.7784 | 0.806 |
| Stepwise | 2100.564784 | 1.216299 | 0.75 | 0.783 | 373 | 594 | 1324 | 0.282 | 0.7183 | 0.823 |
| Stepwise | 2332.835343 | 1.429327 | 0.795 | 0.918 | 427 | 438 | 1426 | 0.354 | 0.6461 | 0.886 |

| A | B |
| --- | --- |
| 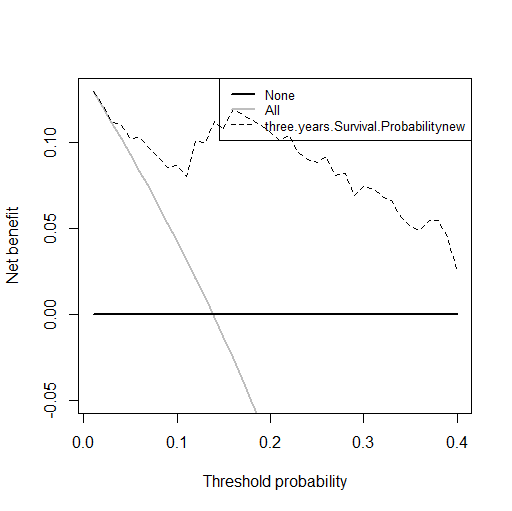 | 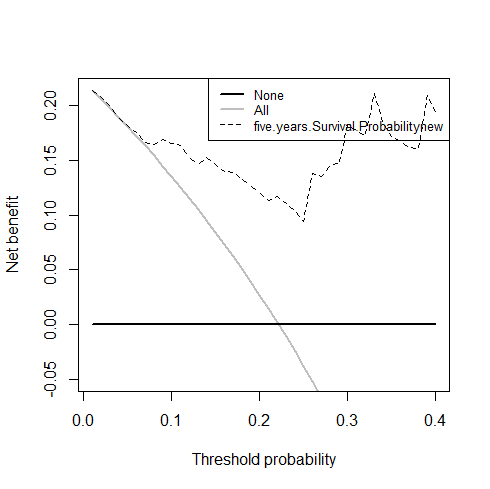 |
| C | D |
| 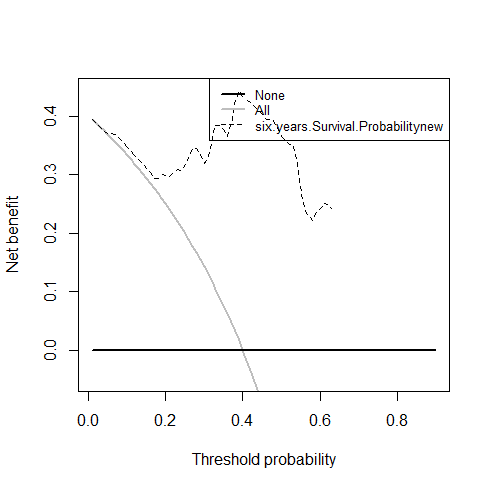 | 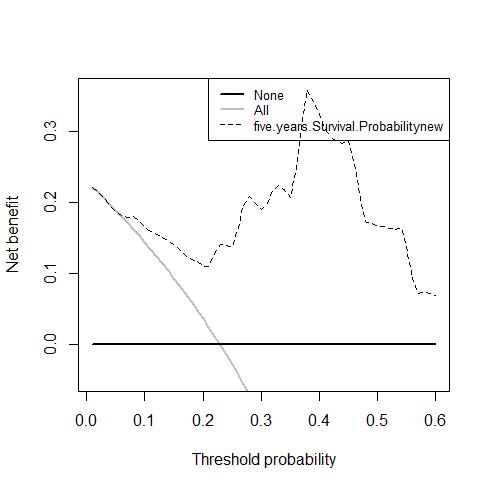 |

**Supplementary figure 1, the decision curve analysis of 3-year and 5-year in the derivation and validation cohort**

**Supplementary figure 2 ROC curves of the Grace risk score model by the derivation cohort (N = 2384). The AUC of the Grace risk score model is 0.672**


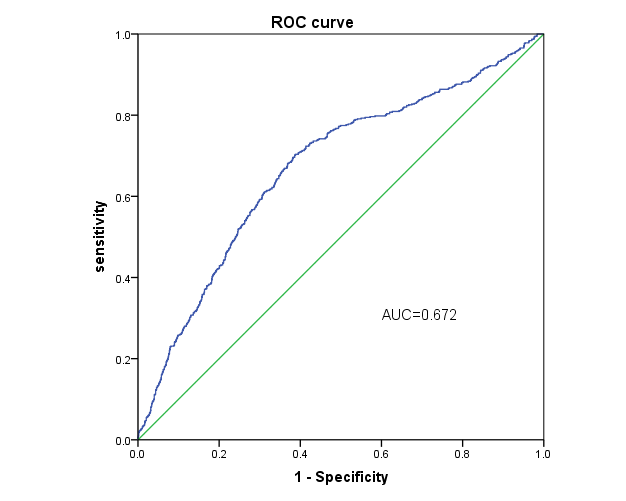


**Supplementary figure 3 Subgroup of predicting all caused death (figure 4A-D), recurrence MI (figure 4E-H) and stroke (figure4 I-L) between the high risk group and relative low risk group in both development and validation group in 3-year and 5-year development and validation cohort.**

**A**


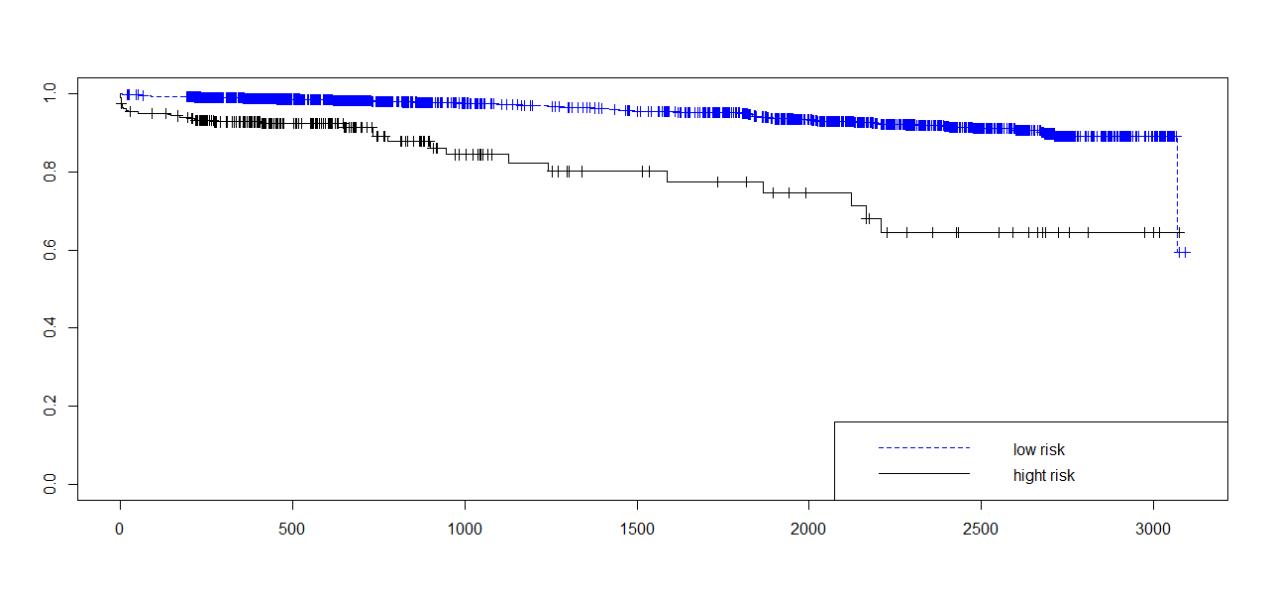


**B**


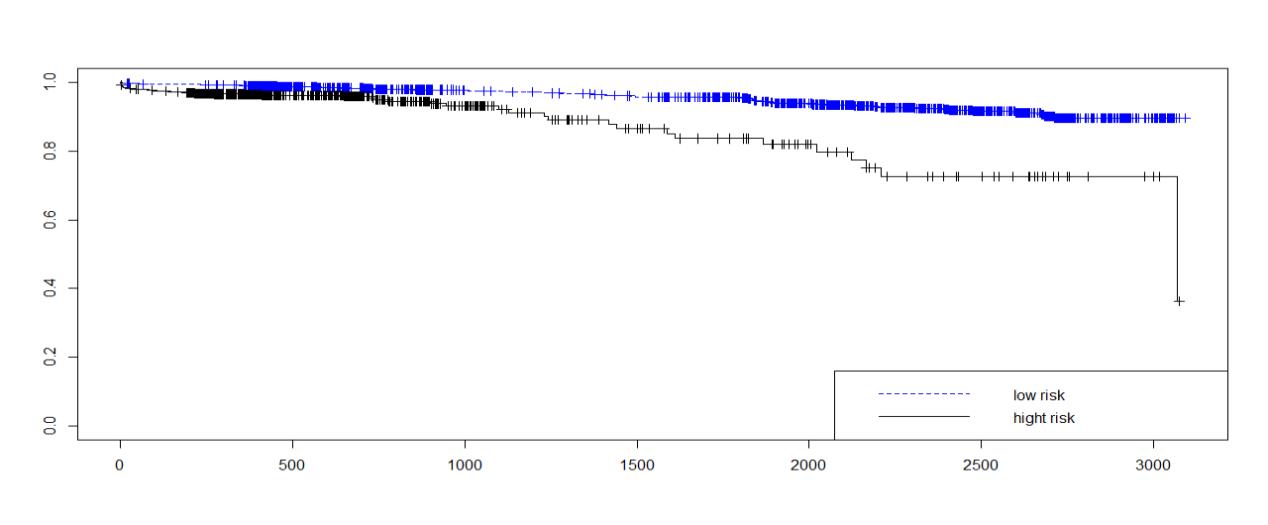


**C**


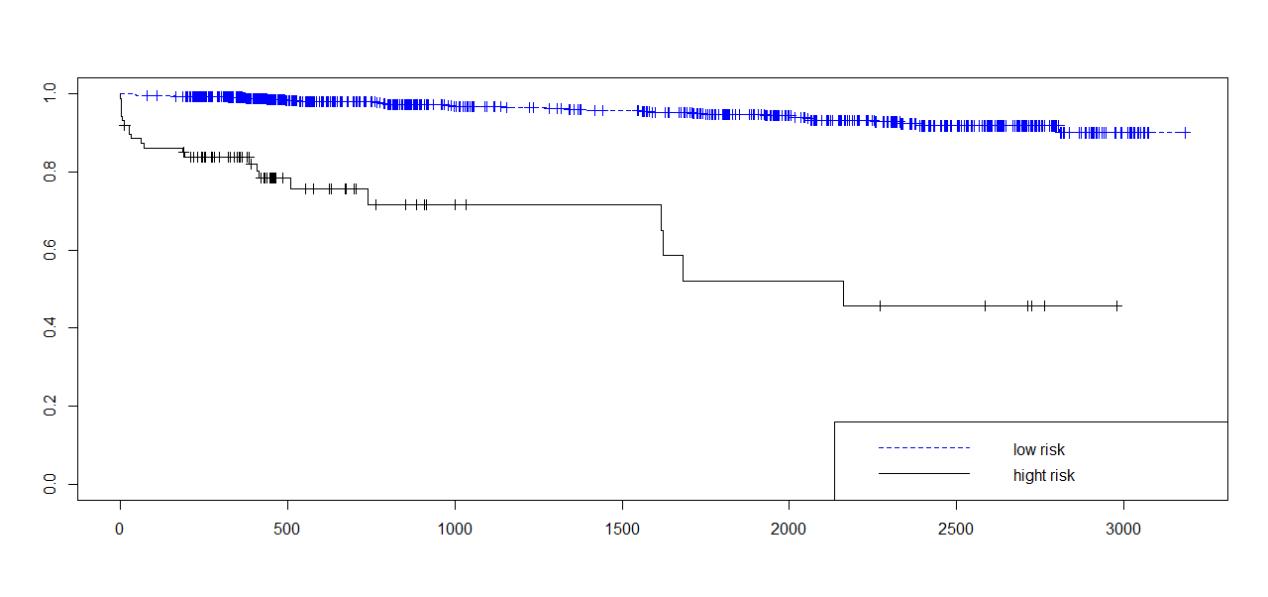


**D**


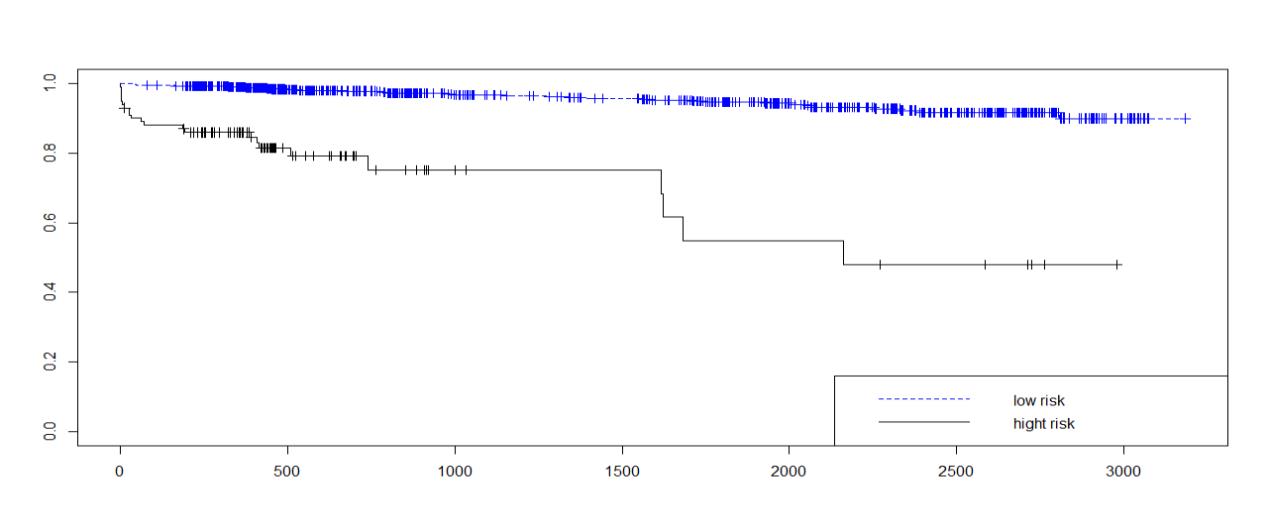


**E**
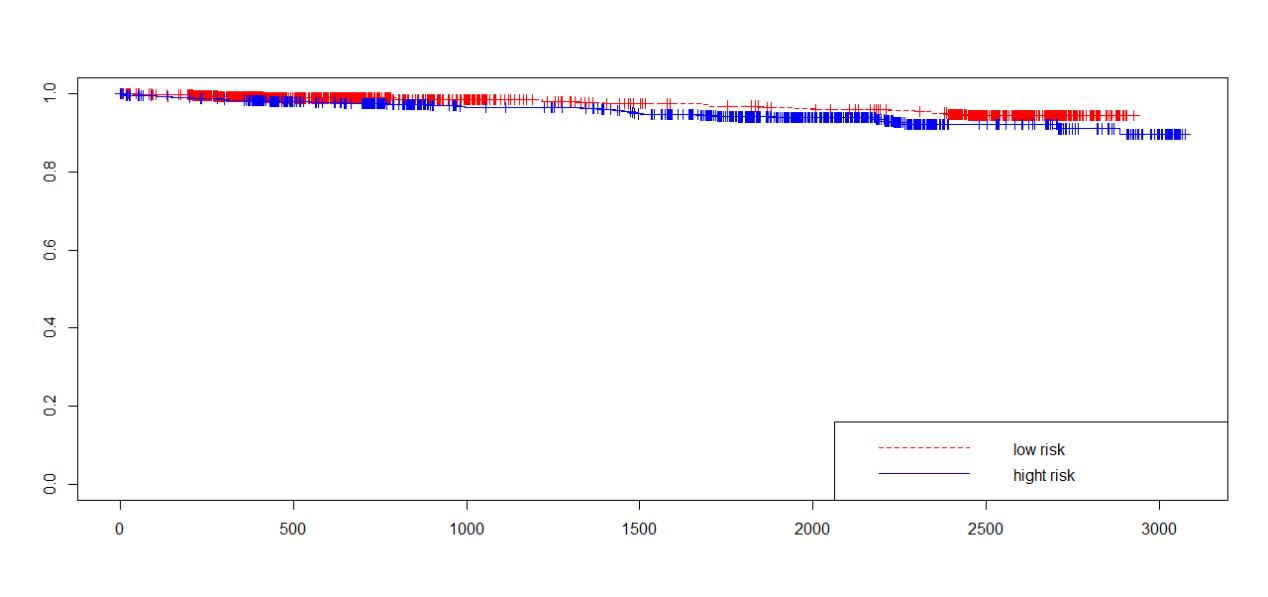


**F**


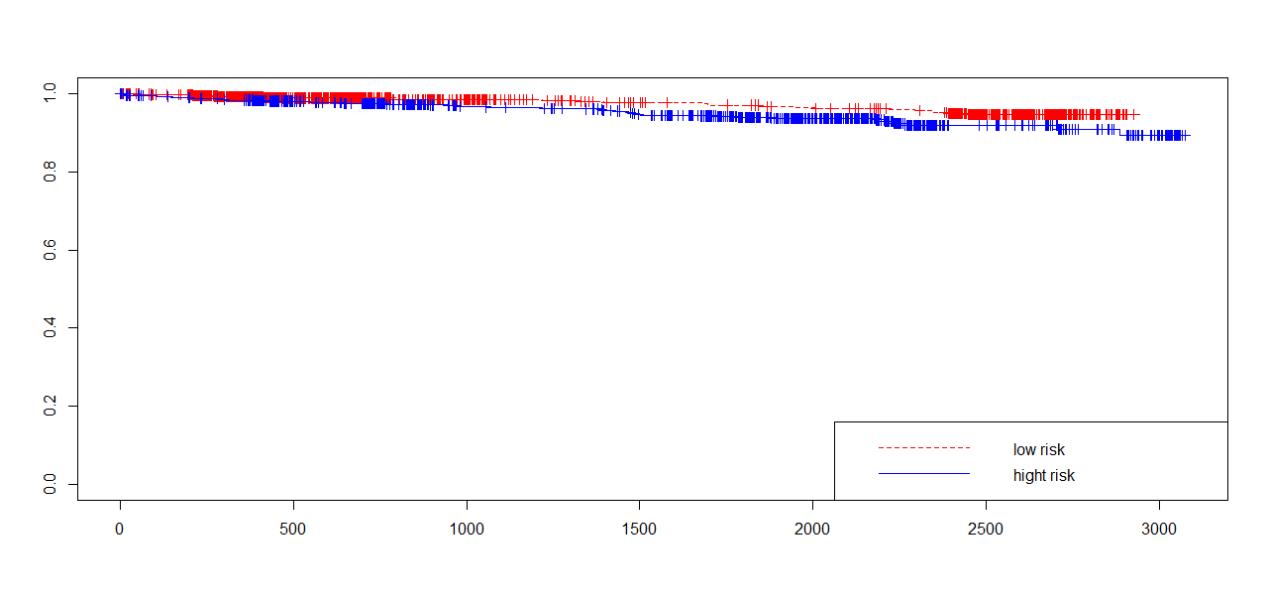


**G**


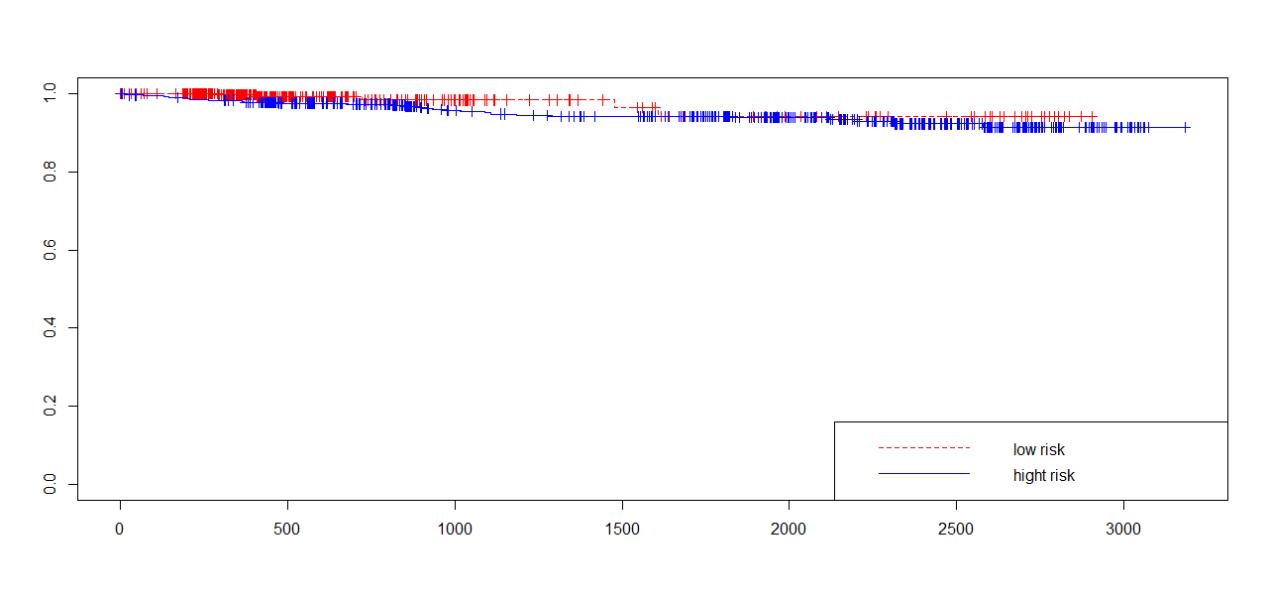


**H**
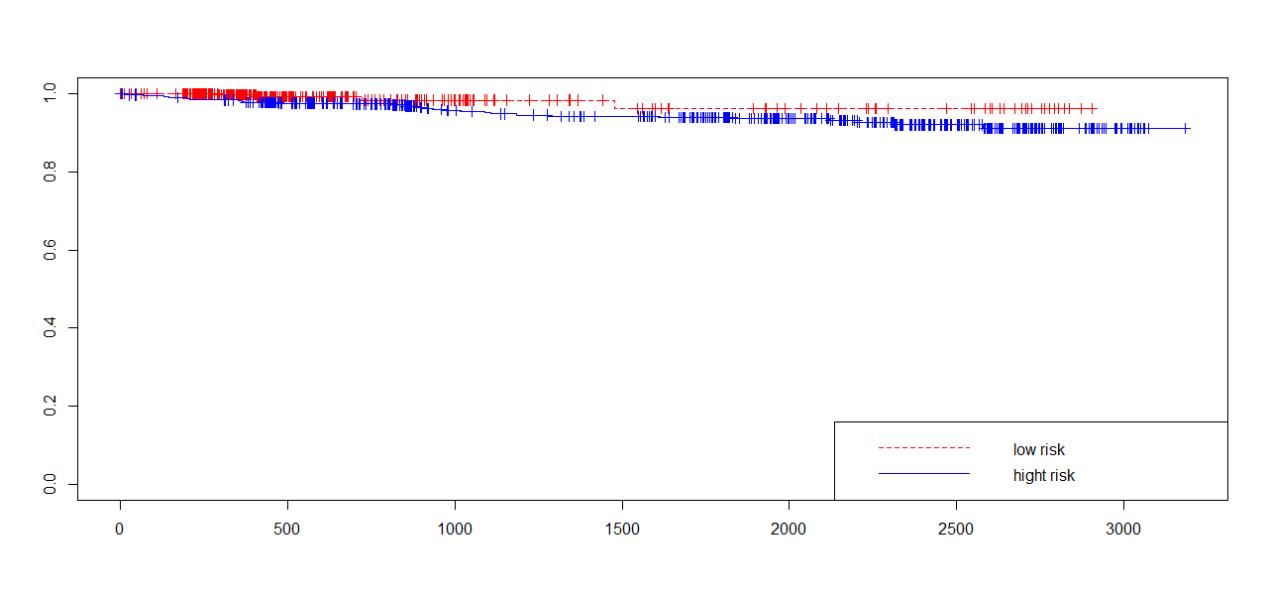


**I**

**
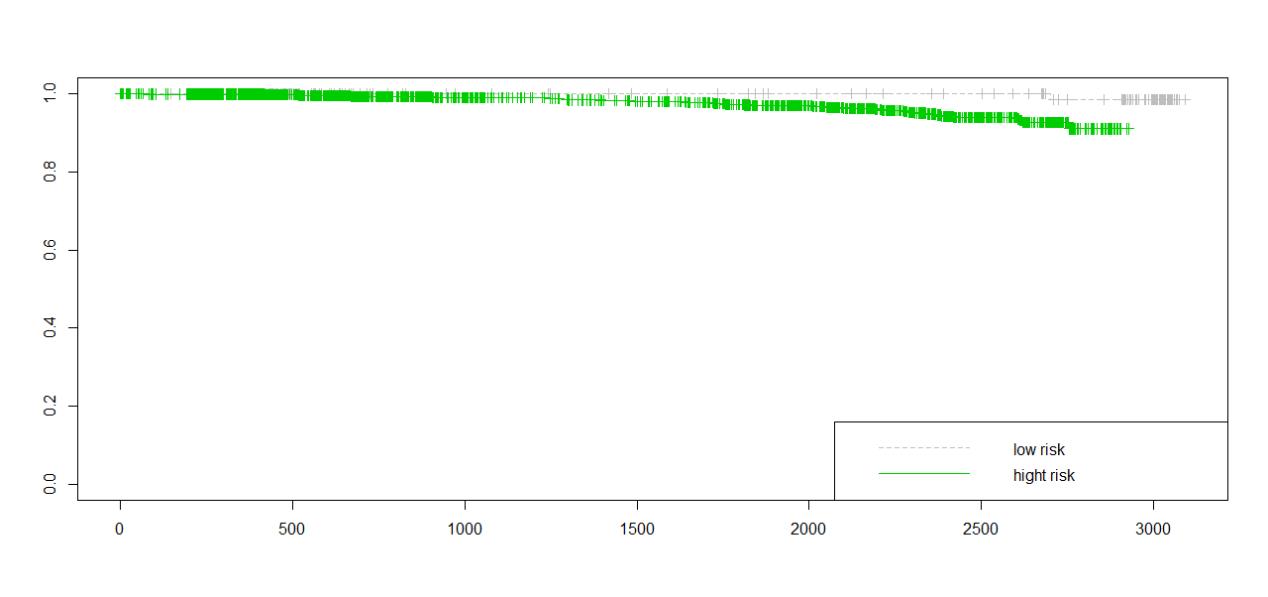
**

**J**


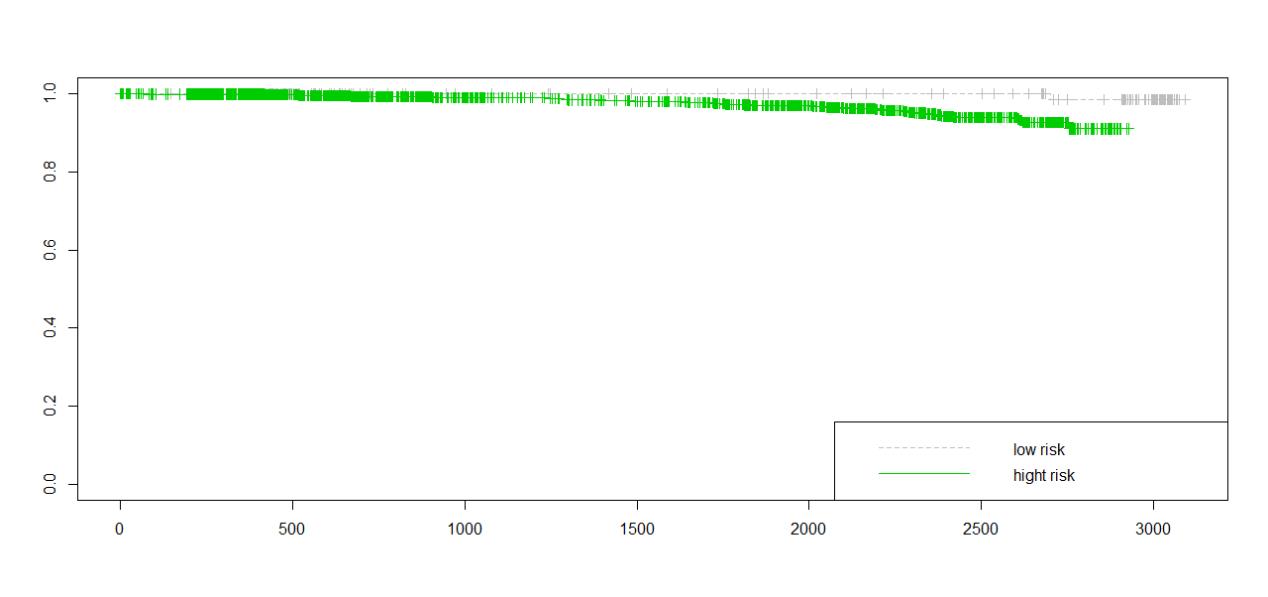


**K**


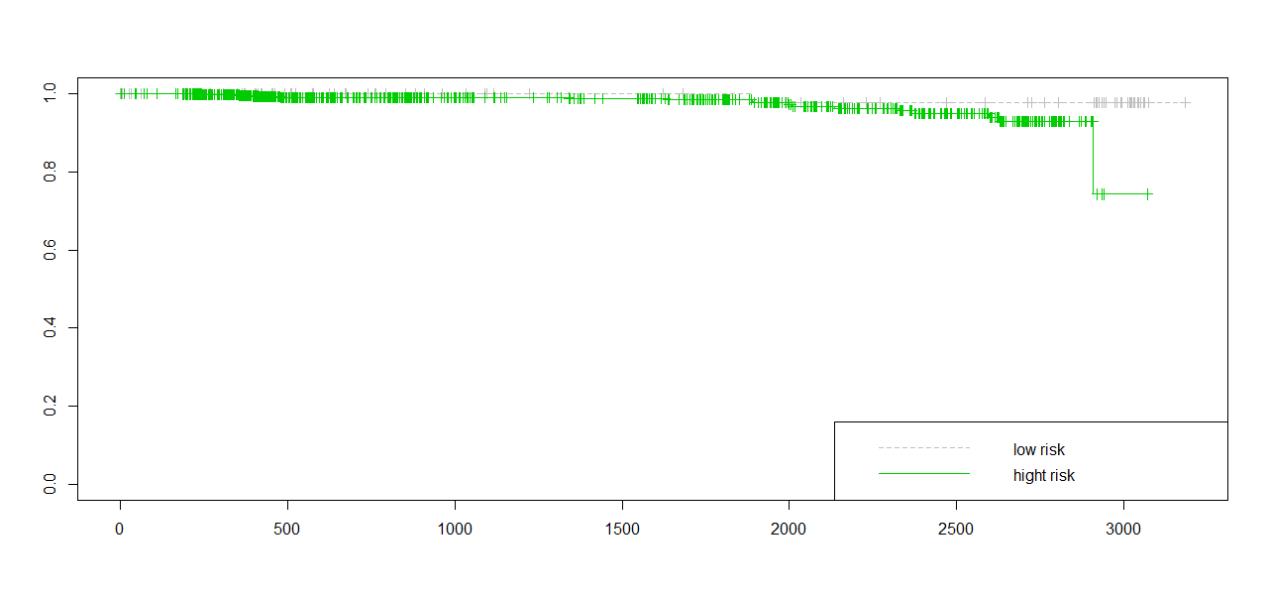


**L**


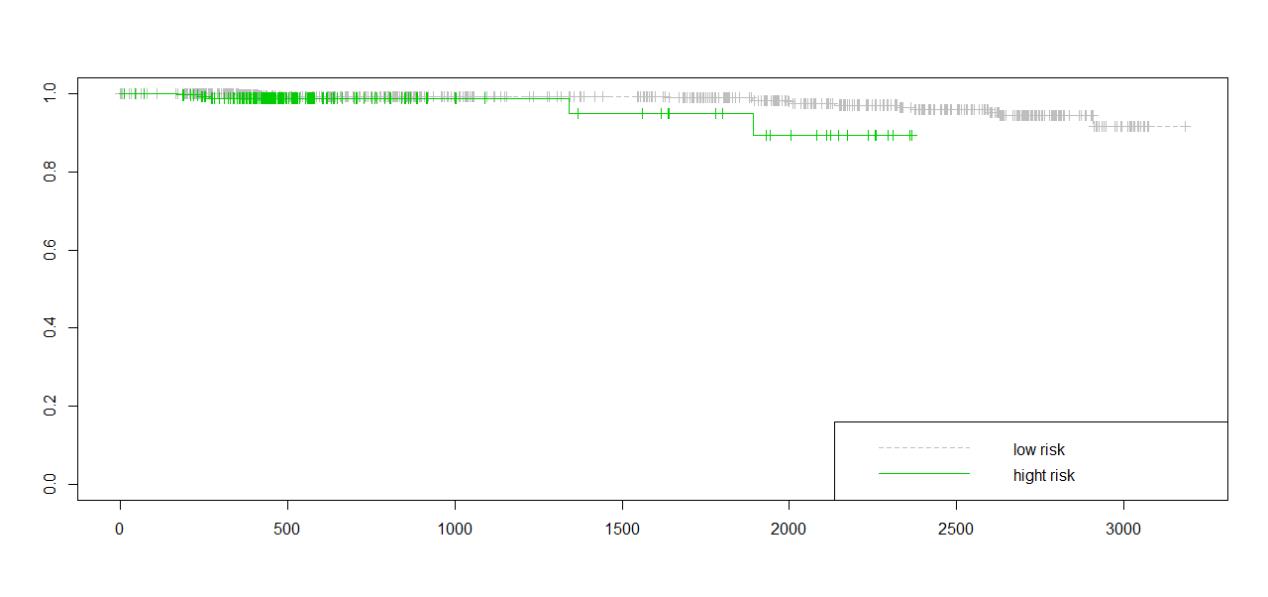


| **Supplementary figure 4 one-fold cross validation**  **Divided the data into ten parts, and then we took the first data set as the training set. Finally, the fitting model is obtained. The ROC curve was as follows. The area under curve (AUC) was 0.744 and the confidence interval was 0.645-0.789.**  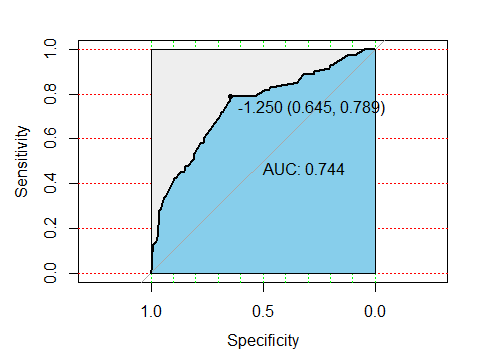 |
| --- |
